# Supplementary material
Source: publisher figshare collection journal article supplement (https://tandf.figshare.com/ndownloader/files/14133710)

*Electronic Supplementary Information*

**New thermally stable condensation polymers containing central ketal moieties derived from malonaldehydetetramethyl acetal and dihydroxyaromatic compounds**

**Ali Rahmatpour*, Niloofar Goodarzi**

*Department of Polymer Chemistry, Faculty of Chemistry, Shahid Beheshti University, P. O. Box: 1983969411, Tehran, Iran. Fax: +982122431671; Tel: +982129903250*

*Corresponding author, *E-mail:* [*a_rahmatpour@sbu.ac.ir*](mailto:a_rahmatpour@sbu.ac.ir)*,* ORCID: 0000-0001-6524-7176

[*niloofargoodarzi555@gmail.com*](mailto:niloofargoodarzi555@gmail.com)*; Tel: +982129905704, Fax: +982122431671*

**Table of content** Page

**General experimental methods** 1

**Spectral data for model compound (R=Cl, R'=Me)** 1-3

**Spectral data for model compound (R=Me, R'=Me)** 3-5


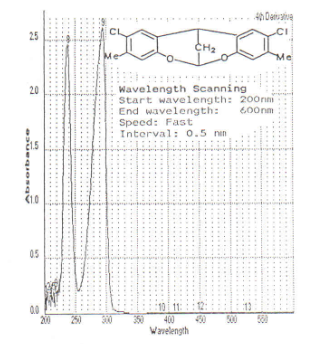


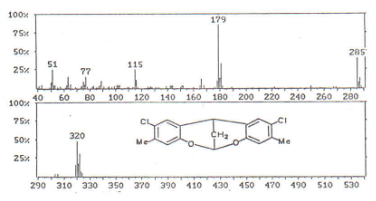


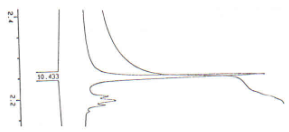

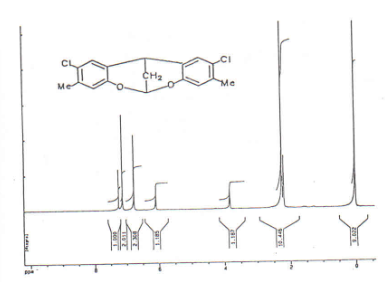


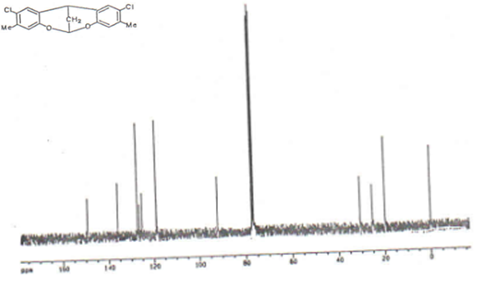


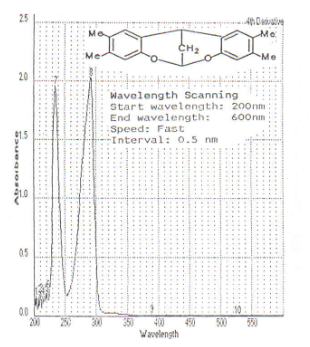


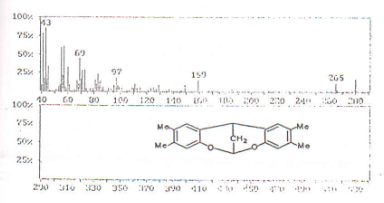


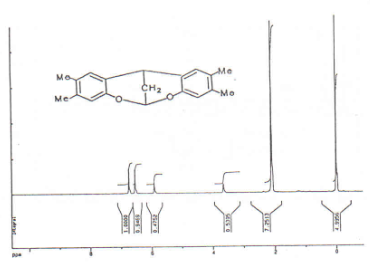


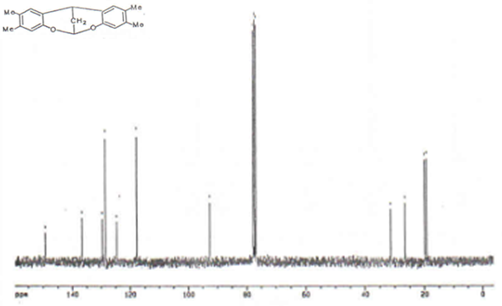

Supplement: Supplementary file 1 [file 14133710]
